# Supplementary material
Source: publisher figshare collection journal article supplement (https://acs.figshare.com/ndownloader/files/10824779)
Supplement: Supplementary file 1 [file 10824779]

# Supporting Information

*Langmuir*

## Electrophoretically Deposited $\text{Y}_2\text{O}_3:\text{Bi}^{3+},\text{Eu}^{3+}$ Nanosheet Films with High Transparency for Near-Ultraviolet to Red Light Conversion

Yuta Kosuge, Yoshiki Iso,\* and Tetsuhiko Isobe\*

Department of Applied Chemistry, Faculty of Science and Technology, Keio University,

3-14-1 Hiyoshi, Kohoku-ku, Yokohama 223-8522, Japan

\*Corresponding authors

E-mail address: iso@aplc.keio.ac.jp (Y.I.), isobe@aplc.keio.ac.jp (T.I.);

Tel: +81 45 566 1558 (Y.I.), +81 45 566 1554 (T.I.); Fax: + 81 45 566 1551

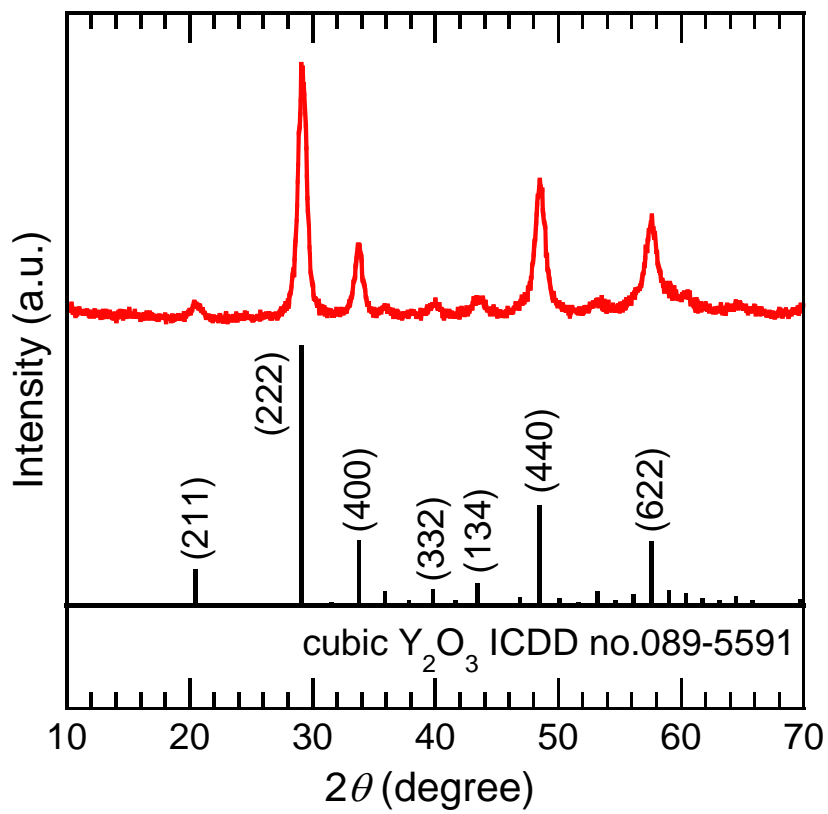

**Figure S1.** XRD profile of calcined sample.

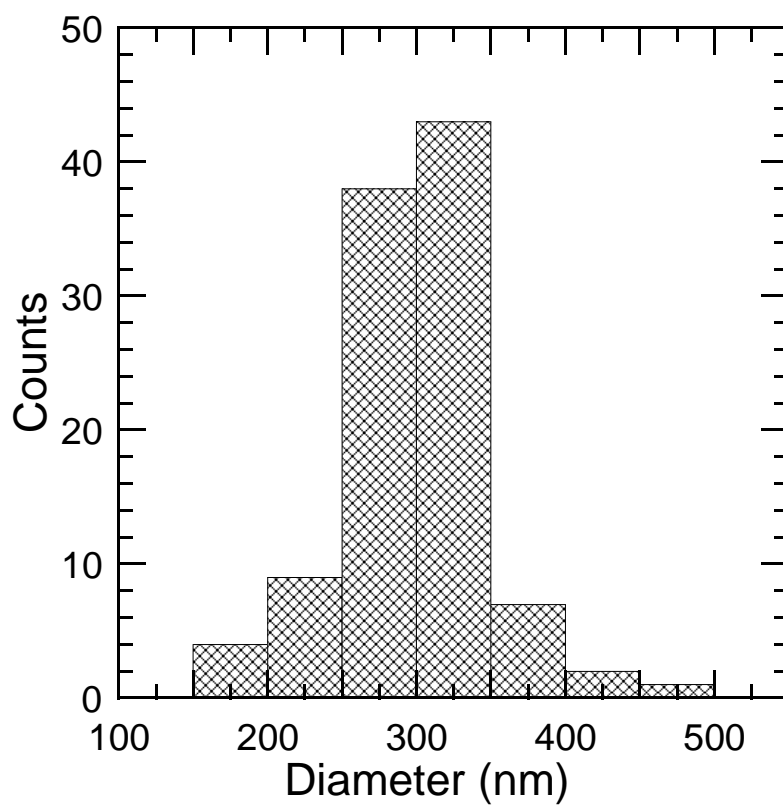

**Figure S2.** Particle size distribution of calcined sample. The lateral dimensions of 100 nanosheets were measured from SEM images.

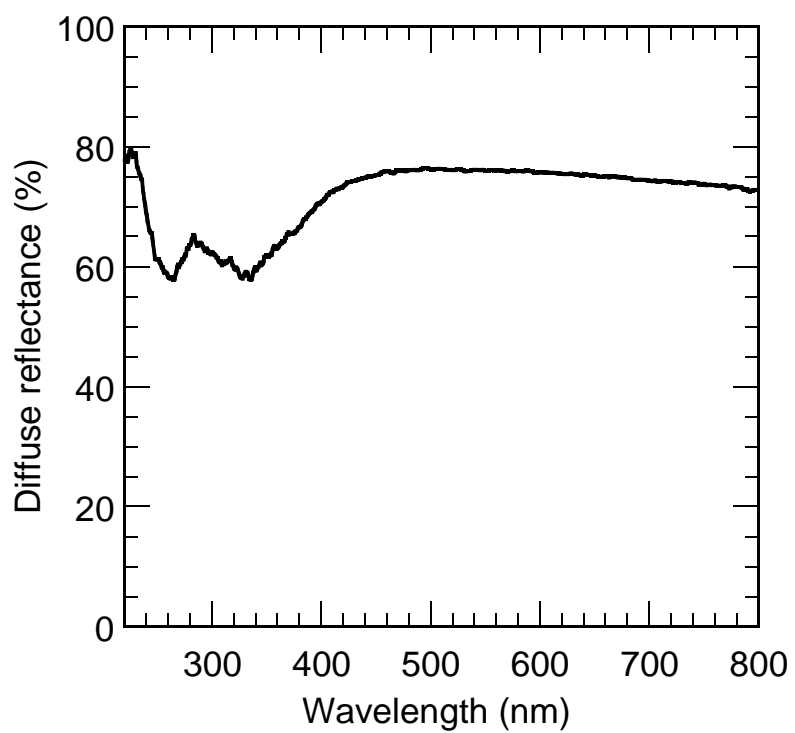

**Figure S3.** UV-vis diffuse reflectance spectrum of calcined sample.

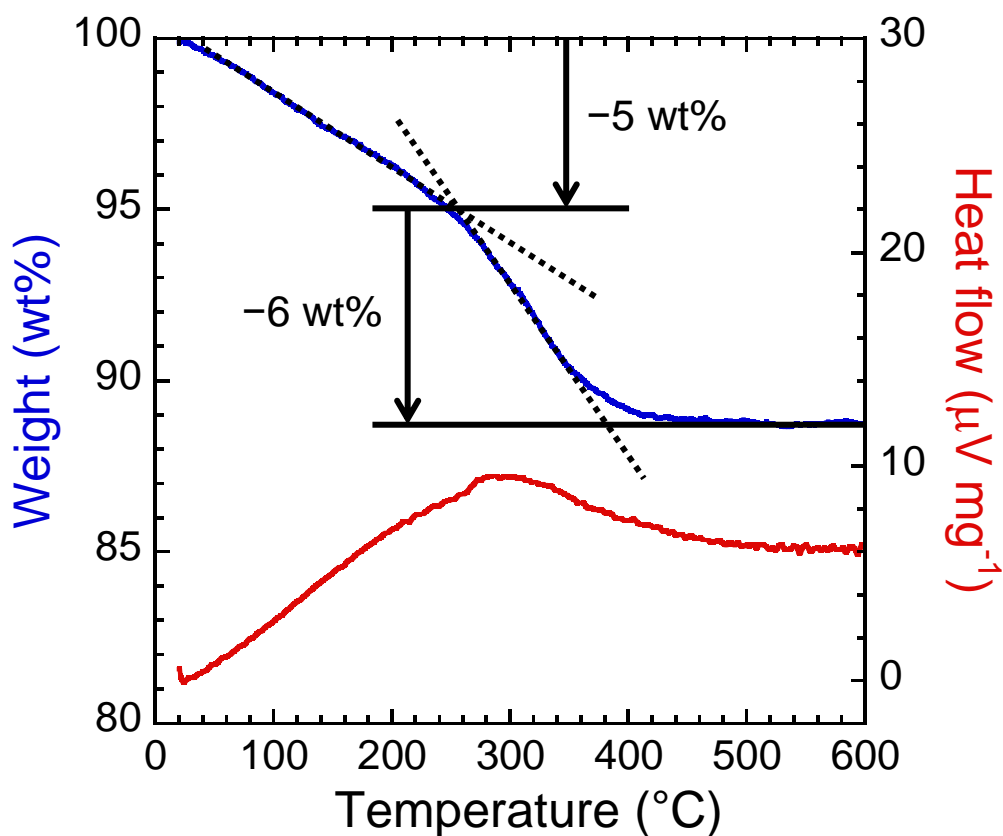

**Figure S4.** TG-DTA profiles of  $\text{Y}_2\text{O}_3:\text{Bi}^{3+},\text{Eu}^{3+}$  nanosheet film. A two-step weight loss was observed in the TG profile. Furthermore, an exothermic peak appeared at  $\sim 290$  °C in the DTA profile, indicating combustion of organic material. The 1st and 2nd stages of the weight loss were therefore assigned to desorption of  $\text{H}_2\text{O}$  and combustion of PEI in the film, respectively.

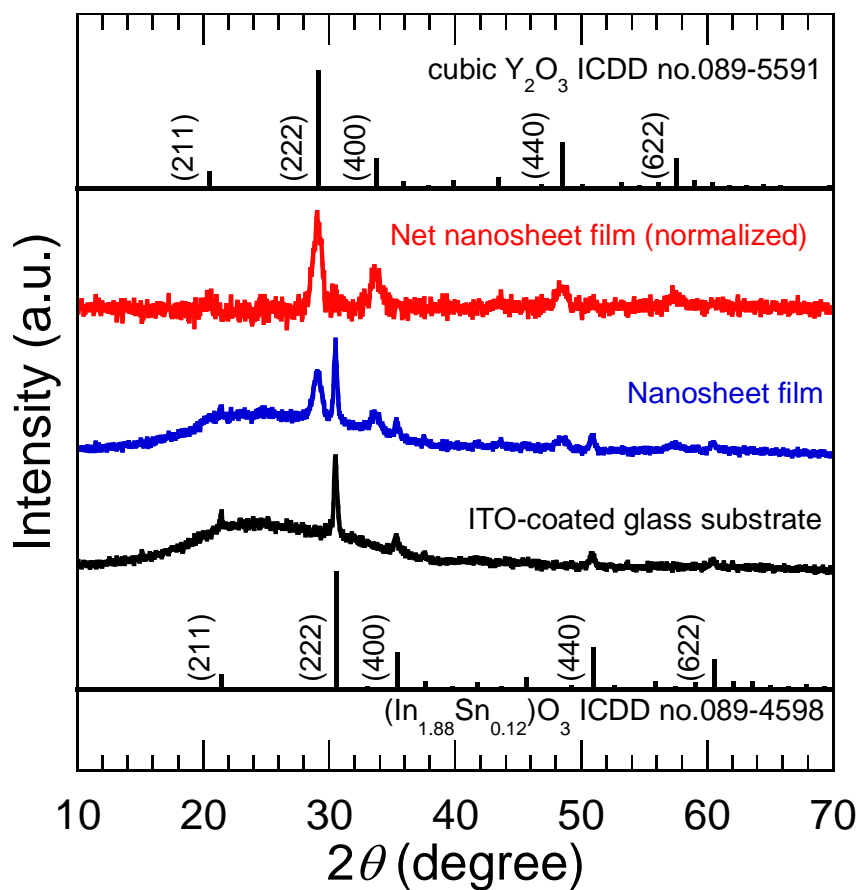

**Figure S5.** XRD profiles of  $\text{Y}_2\text{O}_3:\text{Bi}^{3+},\text{Eu}^{3+}$  nanosheet film sample (deposited for 5 min) and a bare ITO-coated glass substrate. Net profile of nanosheet film obtained by subtracting the intensity of the bare substrate from that of the nanosheet film sample is also shown.

**Table S1.** Comparison of relative peak intensities of the XRD profiles between deposited film and powdered  $\text{Y}_2\text{O}_3:\text{Bi}^{3+},\text{Eu}^{3+}$  nanosheets.

| Miller index | Film<br>(Net profile)               |                         | Powder                              |                         |
|--------------|-------------------------------------|-------------------------|-------------------------------------|-------------------------|
|              | Peak position<br>$2\theta$ (degree) | Relative intensity* (-) | Peak position<br>$2\theta$ (degree) | Relative intensity* (-) |
| (222)        | 29.05                               | 100                     | 29.15                               | 100                     |
| (400)        | 33.60                               | 45.6                    | 33.73                               | 26.8                    |
| (440)        | 48.50                               | 25.3                    | 48.47                               | 42.5                    |
| (622)        | 57.25                               | 24.6                    | 57.50                               | 26.7                    |

\*: Calculated from the net XRD peak intensity.

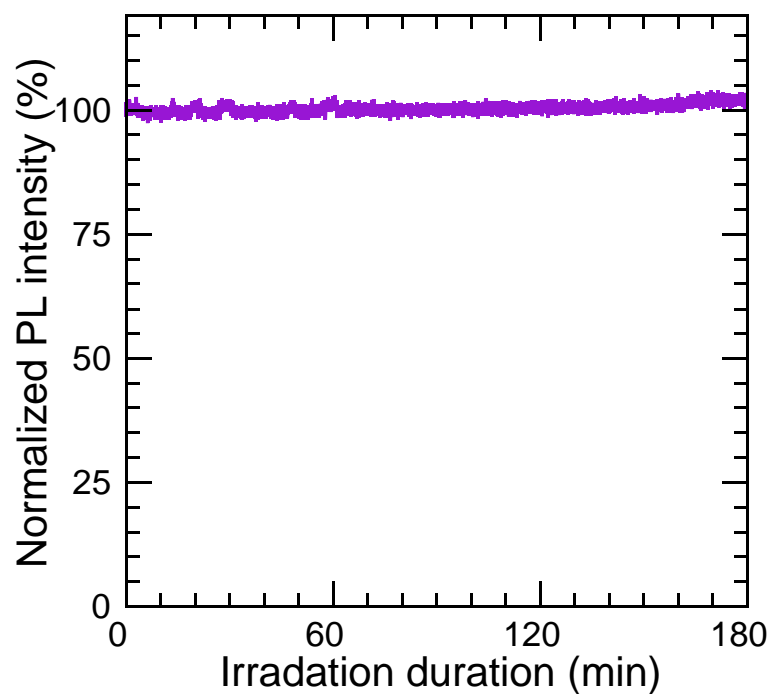

**Figure S6.** Change in PL intensity of  $\text{Y}_2\text{O}_3:\text{Bi}^{3+},\text{Eu}^{3+}$  nanosheet film (deposited for 5 min) under continuous excitation.  $\lambda_{\text{em}} = 612.4$  nm,  $\lambda_{\text{ex}} = 330.1$  nm.



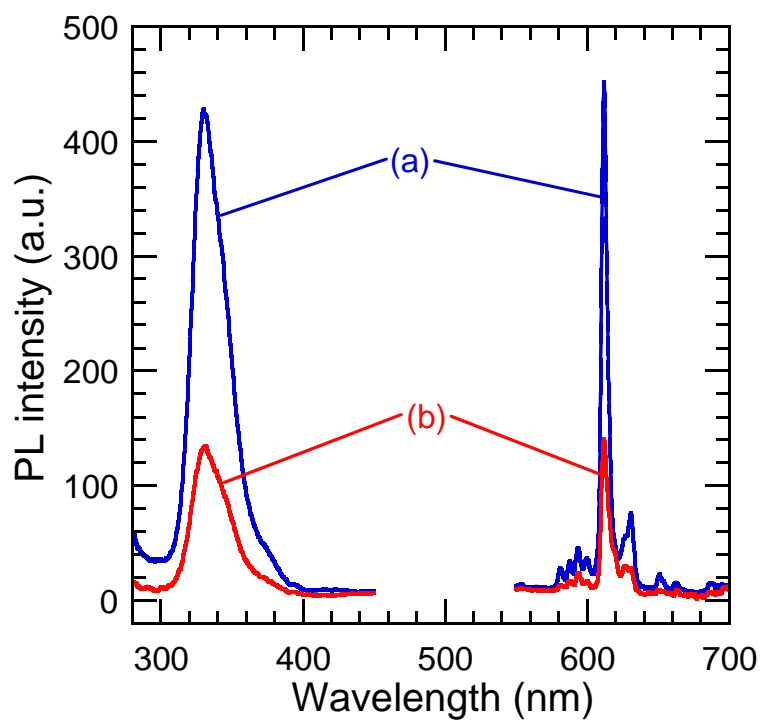

**Figure S7.** PLE and PL spectra of  $\text{Y}_2\text{O}_3:\text{Bi}^{3+},\text{Eu}^{3+}$  nanosheet film sample (deposited for 5 min) (a) before and (b) after PVP coating.  $\lambda_{\text{em}}=612.4$  nm,  $\lambda_{\text{ex}}=330.3$  nm.
